# Supplementary material
Source: MDPI journal article supplement (https://www.mdpi.com/1999-4907/9/7/425)
Supplement: s1 [file s1]

## 1. Questionnaire for non-state certified Forest districts

### 1 What were the reasons for certifying the FD?

- ☐ Competitive advantages
- ☐ Acquiring new clients
- ☐ Improving FD management
- ☐ Reputation
- ☐ Environmental protection
- ☐ Economic advantages
- ☐ NGOs pressures
- ☐ Wood commerce regulations compliance
- ☐ Other reason:

### Changes of forest management aspects associated with forest management certification

### 2 Indicate, on a scale from 1 to 5 the improvements determined by of FSC certification on the following aspect:

| Forest certification associated aspects of forest management | 1-Strongly disagree | 2 | 3 | 4 | 5-Strongly agree |
|--------------------------------------------------------------|---------------------|---|---|---|------------------|
| Improvement of forest management plans                       |                     |   |   |   |                  |
| Monitoring and surveillance                                  |                     |   |   |   |                  |
| Improvement of informational system                          |                     |   |   |   |                  |
| Protection measures for protected areas                      |                     |   |   |   |                  |
| Improved measures for chemicals usage                        |                     |   |   |   |                  |
| Protection of endangered species                             |                     |   |   |   |                  |

### Changes in social aspects of forest management after certification

### 3 Indicate, on a scale from 1 to 5, the improvements determined by FSC certification on following social aspects:

| Forest certification associated social aspects of forest management | 1-Strongly disagree | 2 | 3 | 4 | 5-Strongly agree |
|---------------------------------------------------------------------|---------------------|---|---|---|------------------|
| Public information                                                  |                     |   |   |   |                  |
| Consultations with local communities                                |                     |   |   |   |                  |
| Consultations with decision makers                                  |                     |   |   |   |                  |
| Transparency and clear records                                      |                     |   |   |   |                  |
| Protection of local communities' rights                             |                     |   |   |   |                  |
| Public relations                                                    |                     |   |   |   |                  |
| Relationships with NGOs                                             |                     |   |   |   |                  |
| Working rights compliance                                           |                     |   |   |   |                  |
| Reducing illegal logging                                            |                     |   |   |   |                  |
| Time and effectiveness of petition solving                          |                     |   |   |   |                  |
| Training of personnel                                               |                     |   |   |   |                  |

### Changes of economic aspects associated with forest management certification

### 4 What is your prognosis regarding the future revenues as result of FSC certification of forest management?

- ☐ Unchanged revenues

- ☐ Revenues will increase  
☐ Revenues will decrease

**5 Is the price of certified wood sold to FSC certified companies bigger?**

- ☐ Yes  
☐ No

**If YES, how much bigger is the price for certified wood?**

- under 5%
- 5-10%
- over 10%

**6 What is the impact of FSC certification on the number of customers.**

- ☐ Increase in number of customers  
☐ Decrease in number of customers  
☐ Unchanged number of customers

**7 Indicate, on a scale from 1 to 5 the importance of the following benefits associated with FSC certification:**

| Benefits associated with FSC certification          | 1-Strongly disagree | 2 | 3 | 4 | 5-Strongly agree |
|-----------------------------------------------------|---------------------|---|---|---|------------------|
| Increased sale prices                               |                     |   |   |   |                  |
| New customers                                       |                     |   |   |   |                  |
| Sale increase                                       |                     |   |   |   |                  |
| Continuity in market position                       |                     |   |   |   |                  |
| Increased reputation**                              |                     |   |   |   |                  |
| Improved forest management                          |                     |   |   |   |                  |
| Forest workers` safety                              |                     |   |   |   |                  |
| Better monitoring and control                       |                     |   |   |   |                  |
| Improved relationships with mass-media and NGOs     |                     |   |   |   |                  |
| Improved relationships with controlling authorities |                     |   |   |   |                  |
| Community engagement in forest management           |                     |   |   |   |                  |
| Balanced stakeholders interest                      |                     |   |   |   |                  |
| Increased profitability                             |                     |   |   |   |                  |

**8 Indicate, on a scale from 1 to 5 the importance of the obstacles faced by your FD for FSC certification:**

| Obstacles in obtaining/cheeping the FSC certification         | 1-Strongly disagree | 2 | 3 | 4 | 5-Strongly agree |
|---------------------------------------------------------------|---------------------|---|---|---|------------------|
| Costs of certification                                        |                     |   |   |   |                  |
| Demands of FSC standard                                       |                     |   |   |   |                  |
| FSC standard implementation                                   |                     |   |   |   |                  |
| Lack of advantages from FSC certification                     |                     |   |   |   |                  |
| Low clients interest for FSC certified products               |                     |   |   |   |                  |
| Lack of information/consultants regarding FSC certification** |                     |   |   |   |                  |
| Identified nonconformities after FSC certification            |                     |   |   |   |                  |
| Problems in separating certified-uncertified products         |                     |   |   |   |                  |
| Excessive documentation and records                           |                     |   |   |   |                  |
| Excessive monitoring                                          |                     |   |   |   |                  |

## 2. Questionnaire for uncertified non-state FDs

### 1 What were the reasons for not certifying the FD?

- ☐ FD is not interested in forest certification
- ☐ Forest certification doesn't bring any advantages
- ☐ High costs
- ☐ Refusal of forestland owner (owners)
- ☐ Lack of information about forest certification
- ☐ Difficulty of imposed conditions
- ☐ Other reasons:

### 2 Indicate on a scale from 1 to 5 the benefits that you would expect to be associated with FSC certification.

| Benefits associated with FSC certification          | 1-Strongly disagree | 2 | 3 | 4 | 5-Strongly agree |
|-----------------------------------------------------|---------------------|---|---|---|------------------|
| Increased sale prices                               |                     |   |   |   |                  |
| New customers                                       |                     |   |   |   |                  |
| Sale increase                                       |                     |   |   |   |                  |
| Continuity in market position                       |                     |   |   |   |                  |
| Increased reputation**                              |                     |   |   |   |                  |
| Improved forest management                          |                     |   |   |   |                  |
| Forest workers' safety                              |                     |   |   |   |                  |
| Better monitoring and control                       |                     |   |   |   |                  |
| Improved relationships with mass-media and NGOs     |                     |   |   |   |                  |
| Improved relationships with controlling authorities |                     |   |   |   |                  |
| Community engagement in forest management           |                     |   |   |   |                  |
| Balanced stakeholders interest                      |                     |   |   |   |                  |
| Increased profitability                             |                     |   |   |   |                  |

### 3 Indicate, on a scale from 1 to 5 the importance of the obstacles you think will be faced by your FD for FSC certification:

| Obstacles in obtaining/cheeping the FSC certification         | 1-Strongly disagree | 2 | 3 | 4 | 5-Strongly agree |
|---------------------------------------------------------------|---------------------|---|---|---|------------------|
| Costs of certification                                        |                     |   |   |   |                  |
| Demands of FSC standard                                       |                     |   |   |   |                  |
| FSC standard implementation                                   |                     |   |   |   |                  |
| Lack of advantages from FSC certification                     |                     |   |   |   |                  |
| Low clients interest for FSC certified products               |                     |   |   |   |                  |
| Lack of information/consultants regarding FSC certification** |                     |   |   |   |                  |
| Identified nonconformities after FSC certification            |                     |   |   |   |                  |
| Problems in separating certified-uncertified products         |                     |   |   |   |                  |
| Excessive documentation and records                           |                     |   |   |   |                  |
| Excessive monitoring                                          |                     |   |   |   |                  |

- 4 Will the certification of more than 2.3 millha of state-owned forestland disadvantage our FD because of the customers switch towards certified wood?**
- ☐ Yes
  - ☐ No
  - ☐ I don't know

### 3. Questionnaire for certified forest districts-NFA Romsilva

#### Changes of forest management aspects associated with forest management certification

- 1 Indicate, on a scale from 1 to 5 the improvements determined by of FSC certification on the following aspect:

| Forest certification associated aspects of forest management | 1-Strongly disagree | 2 | 3 | 4 | 5-Strongly agree |
|--------------------------------------------------------------|---------------------|---|---|---|------------------|
| Improvement of forest management plans                       |                     |   |   |   |                  |
| Monitoring and surveillance                                  |                     |   |   |   |                  |
| Improvement of informational system                          |                     |   |   |   |                  |
| Protection measures for protected areas                      |                     |   |   |   |                  |
| Improved measures for chemicals usage                        |                     |   |   |   |                  |
| Protection of endangered species                             |                     |   |   |   |                  |

#### Changes in social aspects of forest management after certification

- 2 Indicate, on a scale from 1 to 5, the improvements determined by FSC certification on following social aspects:

| Forest certification associated social aspects of forest management | 1-Strongly disagree | 2 | 3 | 4 | 5-Strongly agree |
|---------------------------------------------------------------------|---------------------|---|---|---|------------------|
| Public information                                                  |                     |   |   |   |                  |
| Consultations with local communities                                |                     |   |   |   |                  |
| Consultations with decision makers                                  |                     |   |   |   |                  |
| Transparency and clear records                                      |                     |   |   |   |                  |
| Protection of local communities` rights                             |                     |   |   |   |                  |
| Public relations                                                    |                     |   |   |   |                  |
| Relationships with NGOs                                             |                     |   |   |   |                  |
| Working rights compliance                                           |                     |   |   |   |                  |
| Reducing illegal logging                                            |                     |   |   |   |                  |
| Time and effectiveness of petition solving                          |                     |   |   |   |                  |
| Training of personnel                                               |                     |   |   |   |                  |

#### Changes of economic aspects associated with forest management certification

- 3 What is your prognosis regarding the future revenues as result of FSC certification of forest management?
- Unchanged revenues
  - Revenues will increase
  - Revenues will decrease
- 4 Is the price of certified wood sold to FSC certified companies bigger?
- ☐ Yes
- ☐ No

If YES, how much bigger is the price for certified wood?

- under 5%
- 5-10%
- over 10%

- 5 What is the impact of FSC certification on the number of customers.

- d. Increase in number of customers
- e. Decrease in number of customers
- f. Unchanged number of customers

6 Indicate, on a scale from 1 to 5 the importance of the following benefits associated with FSC certification:

| Benefits associated with FSC certification          | 1-Strongly disagree | 2 | 3 | 4 | 5-Strongly agree |
|-----------------------------------------------------|---------------------|---|---|---|------------------|
| Increased sale prices                               |                     |   |   |   |                  |
| New customers                                       |                     |   |   |   |                  |
| Sale increase                                       |                     |   |   |   |                  |
| Continuity in market position                       |                     |   |   |   |                  |
| Increased reputation**                              |                     |   |   |   |                  |
| Improved forest management                          |                     |   |   |   |                  |
| Forest workers` safety                              |                     |   |   |   |                  |
| Better monitoring and control                       |                     |   |   |   |                  |
| Improved relationships with mass-media and NGOs     |                     |   |   |   |                  |
| Improved relationships with controlling authorities |                     |   |   |   |                  |
| Community engagement in forest management           |                     |   |   |   |                  |
| Balanced stakeholders interest                      |                     |   |   |   |                  |
| Increased profitability                             |                     |   |   |   |                  |

7 Indicate, on a scale from 1 to 5 the importance of the obstacles faced by your FD for FSC certification:

| Obstacles in obtaining/cheeping the FSC certification         | 1-Strongly disagree | 2 | 3 | 4 | 5-Strongly agree |
|---------------------------------------------------------------|---------------------|---|---|---|------------------|
| Costs of certification                                        |                     |   |   |   |                  |
| Demands of FSC standard                                       |                     |   |   |   |                  |
| FSC standard implementation                                   |                     |   |   |   |                  |
| Lack of advantages from FSC certification                     |                     |   |   |   |                  |
| Low clients interest for FSC certified products               |                     |   |   |   |                  |
| Lack of information/consultants regarding FSC certification** |                     |   |   |   |                  |
| Identified nonconformities after FSC certification            |                     |   |   |   |                  |
| Problems in separating certified-uncertified products         |                     |   |   |   |                  |
| Excessive documentation and records                           |                     |   |   |   |                  |
| Excessive monitoring                                          |                     |   |   |   |                  |

#### 4. Questionnaire for uncertified state FDs-NFA Romsilva

1. Indicate on a scale from 1 to 5 the benefits that you would expect to be associated with FSC certification.

| Benefits associated with FSC certification          | 1-Strongly disagree | 2 | 3 | 4 | 5-Strongly agree |
|-----------------------------------------------------|---------------------|---|---|---|------------------|
| Increased sale prices                               |                     |   |   |   |                  |
| New customers                                       |                     |   |   |   |                  |
| Sale increase                                       |                     |   |   |   |                  |
| Continuity in market position                       |                     |   |   |   |                  |
| Increased reputation**                              |                     |   |   |   |                  |
| Improved forest management                          |                     |   |   |   |                  |
| Forest workers` safety                              |                     |   |   |   |                  |
| Better monitoring and control                       |                     |   |   |   |                  |
| Improved relationships with mass-media and NGOs     |                     |   |   |   |                  |
| Improved relationships with controlling authorities |                     |   |   |   |                  |
| Community engagement in forest management           |                     |   |   |   |                  |
| Balanced stakeholders interest                      |                     |   |   |   |                  |
| Increased profitability                             |                     |   |   |   |                  |

2. Indicate, on a scale from 1 to 5 the importance of the obstacles you think will be faced by your FD for FSC certification:

| Obstacles in obtaining/cheeping the FSC certification         | 1-Strongly disagree | 2 | 3 | 4 | 5-Strongly agree |
|---------------------------------------------------------------|---------------------|---|---|---|------------------|
| Costs of certification                                        |                     |   |   |   |                  |
| Demands of FSC standard                                       |                     |   |   |   |                  |
| FSC standard implementation                                   |                     |   |   |   |                  |
| Lack of advantages from FSC certification                     |                     |   |   |   |                  |
| Low clients interest for FSC certified products               |                     |   |   |   |                  |
| Lack of information/consultants regarding FSC certification** |                     |   |   |   |                  |
| Identified nonconformities after FSC certification            |                     |   |   |   |                  |
| Problems in separating certified-uncertified products         |                     |   |   |   |                  |
| Excessive documentation and records                           |                     |   |   |   |                  |
| Excessive monitoring                                          |                     |   |   |   |                  |
